# Supplementary material
Source: Springer Nature journal article supplement (https://www.springermedizin.de/resource/supplementary/12884_2013_1086_MOESM4_ESM.pdf/9458810)

EmoCscore

15  
10  
5  
0

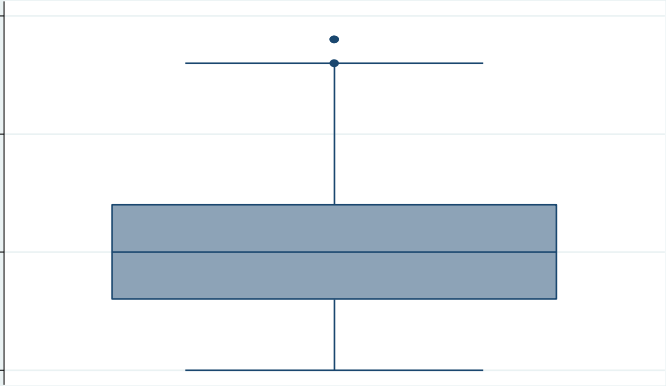

Supplement: MOESM4 [file 9458810]
